# Supplementary material for: Allelic Variation in a Cellulose Synthase Gene (PtoCesA4) Associated with Growth and Wood Properties in Populus tomentosa
Source: PubMed Central journal article supplement (PMC3815066; doi:10.1534/g3.113.007724), 2013-11-01
Supplement: supp_g3.113.007724_TableS1.pdf [file supp_g3.113.007724_TableS1.pdf]

**Table S1 Summary of all SNP markers from *PtoCesA4* used in both association and linkage analysis in this study**

| SNPs     | Position | Association population |                     |                             | Linkage population |                                       |                               |         |
|----------|----------|------------------------|---------------------|-----------------------------|--------------------|---------------------------------------|-------------------------------|---------|
|          |          | Code                   | Mutation            | Minor allele<br>(Frequency) | Code               | Alleles of parents<br>(Female : Male) | Expected<br>segregation ratio | P-value |
| C-SNP-1  | Promoter | SNP1                   | [T C] <sup>nc</sup> | C (0.31)                    | SNP1               | [TC : TC]                             | 1:2:1                         | NS      |
| C-SNP-2  | Promoter | SNP2                   | [G T] <sup>nc</sup> | G (0.37)                    | SNP2               | [GT : GT]                             | 1:2:1                         | NS      |
| C-SNP-3  | Promoter | SNP3                   | [A G] <sup>nc</sup> | A (0.11)                    | SNP3               | [AA : AG]                             | 1:1                           | NS      |
| C-SNP-4  | Promoter | SNP4                   | [T C] <sup>nc</sup> | C (0.32)                    |                    |                                       |                               |         |
| C-SNP-5  | Promoter | SNP5                   | [C A] <sup>nc</sup> | A (0.30)                    |                    |                                       |                               |         |
| C-SNP-6  | Promoter | SNP6                   | [G T] <sup>nc</sup> | T (0.33)                    | SNP6               | [GG : TT]                             | /                             | /       |
| C-SNP-7  | Promoter | SNP7                   | [C G] <sup>nc</sup> | G (0.30)                    |                    |                                       |                               |         |
| C-SNP-8  | Promoter | SNP8                   | [G A] <sup>nc</sup> | A (0.30)                    | SNP8               | [AA : AG]                             | 1:1                           | NS      |
| C-SNP-9  | Promoter | SNP9                   | [C T] <sup>nc</sup> | C (0.32)                    |                    |                                       |                               |         |
| C-SNP-10 | Promoter | SNP10                  | [G A] <sup>nc</sup> | A (0.25)                    | SNP10              | [GG : AG]                             | 1:1                           | NS      |
| C-SNP-11 | Promoter | SNP11                  | [T C] <sup>nc</sup> | C (0.25)                    |                    |                                       |                               |         |
| C-SNP-12 | Promoter | SNP12                  | [A G] <sup>nc</sup> | A (0.35)                    |                    |                                       |                               |         |
| C-SNP-13 | Promoter | SNP13                  | [G A] <sup>nc</sup> | A (0.26)                    | SNP13              | [GA : GA]                             | 1:2:1                         | NS      |
| C-SNP-14 | Promoter | SNP14                  | [A G] <sup>nc</sup> | G (0.30)                    | SNP14              | [TT : AA]                             | /                             | /       |
| C-SNP-15 | Promoter | SNP15                  | [G T] <sup>nc</sup> | G (0.30)                    | SNP15              | [GT : GT]                             | 1:2:1                         | NS      |
| C-SNP-16 | Promoter | SNP16                  | [C T] <sup>nc</sup> | C (0.32)                    |                    |                                       |                               |         |
| C-SNP-17 | Promoter | SNP17                  | [G A] <sup>nc</sup> | G (0.30)                    |                    |                                       |                               |         |
| C-SNP-18 | Promoter | SNP18                  | [T A] <sup>nc</sup> | T (0.28)                    | SNP18              | [TT : AT]                             | 1:1                           | NS      |
| C-SNP-19 | Promoter | SNP19                  | [C T] <sup>nc</sup> | T (0.30)                    |                    |                                       |                               |         |
| C-SNP-20 | Promoter | SNP20                  | [T C] <sup>nc</sup> | T (0.33)                    |                    |                                       |                               |         |
| C-SNP-21 | Promoter | SNP21                  | [G A] <sup>nc</sup> | A (0.30)                    | SNP21              | [GA : GA]                             | 1:2:1                         | NS      |
| C-SNP-22 | Promoter | SNP22                  | [G A] <sup>nc</sup> | G(0.32)                     | SNP22              | [GG : GA]                             | 1:1                           | NS      |

|          |          |       |                     |          |       |           |       |                 |
|----------|----------|-------|---------------------|----------|-------|-----------|-------|-----------------|
| C-SNP-23 | Promoter | SNP23 | [T C] <sup>nc</sup> | T (0.36) | SNP23 | [TT : CC] | /     | /               |
| C-SNP-24 | Promoter | SNP24 | [A T] <sup>nc</sup> | T (0.30) |       |           |       |                 |
| C-SNP-25 | Promoter | SNP25 | [G A] <sup>nc</sup> | G (0.38) | SNP25 | [GA : GA] | 1:2:1 | <i>P</i> < 0.01 |
| C-SNP-26 | Promoter | SNP26 | [G A] <sup>nc</sup> | A (0.30) |       |           |       |                 |
| C-SNP-27 | Promoter | SNP27 | [G T] <sup>nc</sup> | G (0.38) |       |           |       |                 |
| C-SNP-28 | Promoter | SNP28 | [T A] <sup>nc</sup> | T (0.37) | SNP28 | [TA : TA] | 1:2:1 | NS              |
| C-SNP-29 | Promoter | SNP29 | [C T] <sup>nc</sup> | T (0.37) | SNP29 | [CC : TT] | /     | /               |
| C-SNP-30 | Promoter | SNP30 | [G A] <sup>nc</sup> | A (0.33) | SNP30 | [GA : GA] | 1:2:1 | NS              |
| C-SNP-31 | Promoter | SNP31 | [C T] <sup>nc</sup> | T (0.32) | SNP31 | [CT : TT] | 1:1   | NS              |
| C-SNP-32 | Promoter | SNP32 | [A C] <sup>nc</sup> | A (0.40) |       |           |       |                 |
| C-SNP-33 | Promoter | SNP33 | [T C] <sup>nc</sup> | C (0.32) | SNP33 | [CT : CT] | 1:2:1 | NS              |
| C-SNP-34 | Promoter | SNP34 | [G T] <sup>nc</sup> | G (0.40) |       |           |       |                 |
| C-SNP-35 | Promoter | SNP35 | [C T] <sup>nc</sup> | C (0.40) |       |           |       |                 |
| C-SNP-36 | Promoter | SNP36 | [A T] <sup>nc</sup> | A (0.40) | SNP36 | [AT : AT] | 1:2:1 | NS              |
| C-SNP-37 | Promoter | SNP37 | [G T] <sup>nc</sup> | G (0.40) |       |           |       |                 |
| C-SNP-38 | Promoter | SNP38 | [T G] <sup>nc</sup> | T (0.33) |       |           |       |                 |
| C-SNP-39 | Promoter | SNP39 | [G T] <sup>nc</sup> | G (0.40) | SNP39 | [GT : GG] | 1:1   | NS              |
| C-SNP-40 | Promoter | SNP40 | [A G] <sup>nc</sup> | A (0.40) |       |           |       |                 |
| C-SNP-41 | 5'UTR    | SNP41 | [T C] <sup>nc</sup> | T (0.23) | SNP41 | [CT : CT] | 1:2:1 | NS              |
| C-SNP-42 | 5'UTR    | SNP42 | [C T] <sup>nc</sup> | C (0.45) | SNP42 | [CT : CT] | 1:2:1 | NS              |
| C-SNP-43 | Intron 1 | SNP43 | [T C] <sup>nc</sup> | T (0.13) |       |           |       |                 |
| C-SNP-44 | Intron 1 | SNP44 | [G T] <sup>nc</sup> | T (0.15) | SNP44 | [GT : GT] | 1:2:1 | NS              |
| C-SNP-45 | Exon 2   | SNP45 | [A C] <sup>s</sup>  | A (0.16) | SNP45 | [AC : AA] | 1:1   | NS              |
| C-SNP-46 | Exon 2   | SNP46 | [T C] <sup>s</sup>  | T (0.40) | SNP46 | [CT : CT] | 1:2:1 | NS              |
| C-SNP-47 | Exon 2   | SNP47 | [T C] <sup>s</sup>  | T (0.37) | SNP47 | [TT : CT] | 1:1   | NS              |
| C-SNP-48 | Intron 2 | SNP48 | [A T] <sup>nc</sup> | T (0.44) | SNP48 | [AT : AA] | 1:1   | NS              |
| C-SNP-49 | Exon 3   | SNP49 | [C A] <sup>ns</sup> | A (0.42) | SNP49 | [AC : AC] | 1:2:1 | NS              |
| C-SNP-50 | Intron 3 | SNP50 | [C A] <sup>nc</sup> | G (0.10) |       |           |       |                 |

|          |          |       |                     |          |       |           |       |                 |
|----------|----------|-------|---------------------|----------|-------|-----------|-------|-----------------|
| C-SNP-51 | Intron 3 | SNP51 | [C A] <sup>nc</sup> | A (0.32) | SNP51 | [AC : AC] | 1:2:1 | NS              |
| C-SNP-52 | Intron 3 | SNP52 | [G T] <sup>nc</sup> | T (0.47) |       |           |       |                 |
| C-SNP-53 | Exon 4   | SNP53 | [C T] <sup>s</sup>  | C (0.35) |       |           |       |                 |
| C-SNP-54 | Exon 5   | SNP54 | [A G] <sup>s</sup>  | A (0.42) | SNP54 | [GG : AA] | /     | /               |
| C-SNP-55 | Intron 5 | SNP55 | [T C] <sup>nc</sup> | T (0.35) |       |           |       |                 |
| C-SNP-56 | Intron 5 | SNP56 | [G A] <sup>nc</sup> | G (0.43) | SNP56 | [AG : AG] | 1:2:1 | NS              |
| C-SNP-57 | Exon 6   | SNP57 | [T C] <sup>s</sup>  | T (0.38) | SNP57 | [TT : TC] | 1:1   | NS              |
| C-SNP-58 | Exon 6   | SNP58 | [T C] <sup>s</sup>  | T (0.40) |       |           |       |                 |
| C-SNP-59 | Exon 6   | SNP59 | [A C] <sup>ns</sup> | A (0.38) | SNP59 | [AA : AC] | 1:1   | NS              |
| C-SNP-60 | Exon 6   | SNP60 | [G C] <sup>s</sup>  | C (0.13) |       |           |       |                 |
| C-SNP-61 | Exon 6   | SNP61 | [T C] <sup>s</sup>  | C (0.13) |       |           |       |                 |
| C-SNP-62 | Intron 6 | SNP62 | [T G] <sup>nc</sup> | G (0.13) | SNP62 | [TT : TG] | 1:1   | NS              |
| C-SNP-63 | Intron 6 | SNP63 | [T C] <sup>nc</sup> | C (0.13) |       |           |       |                 |
| C-SNP-64 | Intron 6 | SNP64 | [T C] <sup>nc</sup> | C (0.13) | SNP64 | [TC : TC] | 1:2:1 | NS              |
| C-SNP-65 | Intron 6 | SNP65 | [G A] <sup>nc</sup> | A (0.13) | SNP65 | [AA : GG] | /     | /               |
| C-SNP-66 | Exon 7   | SNP66 | [A G] <sup>s</sup>  | G (0.13) |       |           |       |                 |
| C-SNP-67 | Exon 7   | SNP67 | [G C] <sup>s</sup>  | C (0.13) |       |           |       |                 |
| C-SNP-68 | Exon 9   | SNP68 | [T G] <sup>s</sup>  | G (0.10) | SNP68 | [TG : TG] | 1:2:1 | NS              |
| C-SNP-69 | Exon 9   | SNP69 | [T C] <sup>s</sup>  | C (0.10) |       |           |       |                 |
| C-SNP-70 | Intron 9 | SNP70 | [A T] <sup>nc</sup> | T (0.15) | SNP70 | [AT : AT] | 1:2:1 | NS              |
| C-SNP-71 | Intron 9 | SNP71 | [C A] <sup>nc</sup> | A (0.15) |       |           |       |                 |
| C-SNP-72 | Intron 9 | SNP72 | [T A] <sup>nc</sup> | A (0.10) | SNP72 | [AT : TT] | 1:1   | NS              |
| C-SNP-73 | Exon 10  | SNP73 | [G A] <sup>s</sup>  | A (0.12) |       |           |       |                 |
| C-SNP-74 | Exon 10  | SNP74 | [A G] <sup>s</sup>  | A (0.45) |       |           |       |                 |
| C-SNP-75 | Exon 10  | SNP75 | [T C] <sup>s</sup>  | T (0.43) | SNP75 | [CT : CT] | 1:2:1 | NS              |
| C-SNP-76 | Exon 10  | SNP76 | [T C] <sup>s</sup>  | C (0.47) |       |           |       |                 |
| C-SNP-77 | Exon 10  | SNP77 | [A G] <sup>s</sup>  | A (0.42) | SNP77 | [AG : AG] | 1:2:1 | <i>P</i> < 0.01 |
| C-SNP-78 | Exon 10  | SNP78 | [G A] <sup>s</sup>  | G (0.40) |       |           |       |                 |

|          |           |       |                      |          |       |           |       |                 |
|----------|-----------|-------|----------------------|----------|-------|-----------|-------|-----------------|
| C-SNP-79 | Intron 10 | SNP79 | [T A ] <sup>nc</sup> | A (0.33) | SNP79 | [AT : AA] | 1:1   | NS              |
| C-SNP-80 | Intron 10 | SNP80 | [A G ] <sup>nc</sup> | A (0.33) |       |           |       |                 |
| C-SNP-81 | Intron 10 | SNP81 | [T C ] <sup>nc</sup> | A (0.46) | SNP81 | [TT : CT] | 1:1   | NS              |
| C-SNP-82 | Intron 10 | SNP82 | [A T ] <sup>nc</sup> | A (0.42) |       |           |       |                 |
| C-SNP-83 | Intron 10 | SNP83 | [G A ] <sup>nc</sup> | G (0.27) |       |           |       |                 |
| C-SNP-84 | Intron 11 | SNP84 | [G A ] <sup>nc</sup> | A (0.35) | SNP84 | [AG : AG] | 1:2:1 | NS              |
| C-SNP-85 | Intron 11 | SNP85 | [T G ] <sup>nc</sup> | G (0.35) | SNP85 | [AA : AG] | 1:1   | <i>P</i> < 0.01 |
| C-SNP-86 | Exon 12   | SNP86 | [T C ] <sup>s</sup>  | T (0.42) | SNP86 | [TC : TC] | 1:2:1 | NS              |
| C-SNP-87 | Exon 12   | SNP87 | [T C ] <sup>s</sup>  | T (0.42) |       |           |       |                 |
| C-SNP-88 | Exon 12   | SNP88 | [G A ] <sup>ns</sup> | A (0.37) | SNP88 | [AG : AG] | 1:2:1 | NS              |
| C-SNP-89 | 3'UTR     | SNP89 | [G C ] <sup>nc</sup> | C (0.32) | SNP89 | [CG : CG] | 1:2:1 | NS              |
| C-SNP-90 | 3'UTR     | SNP90 | [G A ] <sup>nc</sup> | A (0.35) |       |           |       |                 |
| C-SNP-91 | 3'UTR     | SNP91 | [T A ] <sup>nc</sup> | A (0.37) | SNP91 | [AT : AA] | 1:1   | NS              |
| C-SNP-92 | 3'UTR     | SNP92 | [T C ] <sup>nc</sup> | C (0.38) |       |           |       |                 |
| NSNP-1   | Promoter  |       |                      |          | NSNP1 | [CC : TC] | 1:1   | NS              |
| NSNP-2   | Promoter  |       |                      |          | NSNP2 | [AA : AT] | 1:1   | NS              |
| NSNP-3   | Promoter  |       |                      |          | NSNP3 | [AG : AG] | 1:2:1 | NS              |
| NSNP-4   | Intron 3  |       |                      |          | NSNP4 | [GG : GT] | 1:1   | <i>P</i> < 0.01 |
| NSNP-5   | Intron 10 |       |                      |          | NSNP5 | [AG : AG] | 1:2:1 | NS              |
| NSNP-6   | 3'UTR     |       |                      |          | NSNP6 | [TT : CT] | 1:1   | NS              |

“C-SNP-” represents the common SNP identified in association mapping with the minor allele frequencies >0.10; “NSNP-” represents the novel unique SNPs identified in the parents of the linkage population; nonsynonymous polymorphism (ns); synonymous polymorphism (s); noncoding polymorphism (nc);. Not significant (NS); Not applied (/); the  $\chi^2$  significance level of was *P* < 0.01.
