# Supplementary material for: Allelic Variation in a Cellulose Synthase Gene (PtoCesA4) Associated with Growth and Wood Properties in Populus tomentosa
Source: PubMed Central journal article supplement (PMC3815066; doi:10.1534/g3.113.007724), 2013-11-01
Supplement: supp_g3.113.007724_TableS2.pdf [file supp_g3.113.007724_TableS2.pdf]

**Table S2** Summary of significant SNP marker-trait pairs identified at the threshold of  $P \leq 0.05$ , using the mixed linear model (MLM) in the *Populus tomentosa* association population.

| Trait                   | Locus | Position  | Mutation | Association population<br>( $N = 460$ ) |          |                    |
|-------------------------|-------|-----------|----------|-----------------------------------------|----------|--------------------|
|                         |       |           |          | P-value                                 | Q-value  | R <sup>2</sup> (%) |
| Lignin                  |       |           |          |                                         |          |                    |
|                         | SNP2  | Promoter  | [G : T]  | 0.0069                                  | Q > 0.10 | 3.4                |
|                         | SNP24 | Promoter  | [A : T]  | 0.0434                                  | Q > 0.10 | 3.0                |
|                         | SNP44 | Intron1   | [G : T]  | 0.0012                                  | 0.0551   | 2.1                |
|                         | SNP47 | Exon 2    | [T : C]  | 0.0500                                  | Q > 0.10 | 1.9                |
|                         | SNP49 | Exon 3    | [C : A]  | 0.0025                                  | 0.0810   | 3.0                |
| $\alpha$ -cellulose     |       |           |          |                                         |          |                    |
|                         | SNP3  | Promoter  | [A : G]  | 0.0015                                  | 0.0629   | 2.2                |
|                         | SNP18 | Promoter  | [T : A]  | 0.0011                                  | 0.0551   | 2.5                |
|                         | SNP36 | promoter  | [A : T]  | 0.0061                                  | Q > 0.10 | 3.5                |
|                         | SNP41 | 5'UTR     | [T : C]  | 3.02E-05                                | 0.0035   | 1.6                |
|                         | SNP48 | Intron 2  | [A : T]  | 0.0400                                  | Q > 0.10 | 2.2                |
|                         | SNP49 | Exon 3    | [C : A]  | 0.0031                                  | 0.0948   | 5.3                |
|                         | SNP50 | Intron 3  | [C : A]  | 0.0142                                  | Q > 0.10 | 1.7                |
| Holocellulose           |       |           |          |                                         |          |                    |
|                         | SNP27 | Promoter  | [G : T]  | 0.0281                                  | Q > 0.10 | 6.0                |
|                         | SNP38 | Promoter  | [T : G]  | 0.0052                                  | Q > 0.10 | 2.9                |
|                         | SNP45 | Exon 2    | [A : C]  | 0.0002                                  | 0.0142   | 4.0                |
|                         | SNP48 | Intron 2  | [A : T]  | 0.0351                                  | Q > 0.10 | 4.4                |
|                         | SNP62 | Intron 6  | [T : G]  | 0.0104                                  | Q > 0.10 | 3.4                |
|                         | SNP70 | Intron 9  | [A : T]  | 0.0069                                  | Q > 0.10 | 2.5                |
|                         | SNP81 | Intron 10 | [T : C]  | 0.0002                                  | 0.0142   | 3.0                |
|                         | SNP88 | Exon 12   | [G : A]  | 0.0161                                  | Q > 0.10 | 1.9                |
| Fiber length            |       |           |          |                                         |          |                    |
|                         | SNP2  | Promoter  | [G : T]  | 0.0355                                  | Q > 0.10 | 6.7                |
|                         | SNP44 | Intron1   | [G : T]  | 0.0194                                  | Q > 0.10 | 2.0                |
|                         | SNP89 | 3'UTR     | [G : C]  | 0.0070                                  | Q > 0.10 | 1.5                |
|                         | SNP90 | 3'UTR     | [G : A]  | 0.0122                                  | Q > 0.10 | 1.9                |
| Fiber width             |       |           |          |                                         |          |                    |
|                         | SNP58 | Exon 6    | [T : C]  | 0.0500                                  | Q > 0.10 | 3.9                |
|                         | SNP59 | Exon 6    | [A : C]  | 0.0008                                  | 0.0440   | 2.6                |
|                         | SNP62 | Intron 6  | [T : G]  | 0.0475                                  | Q > 0.10 | 1.8                |
|                         | SNP70 | Intron 9  | [A : T]  | 0.0477                                  | Q > 0.10 | 1.8                |
| Microfibril angle (MFA) |       |           |          |                                         |          |                    |
|                         | SNP10 | Promoter  | [G : A]  | 0.0372                                  | Q > 0.10 | 1.7                |
|                         | SNP47 | Exon 2    | [T : C]  | 0.0195                                  | Q > 0.10 | 2.6                |

|                               |       |           |         |          |          |     |
|-------------------------------|-------|-----------|---------|----------|----------|-----|
| Diameter at breast height (D) |       |           |         |          |          |     |
|                               | SNP48 | Intron 2  | [A : T] | 0.0009   | 0.0454   | 1.9 |
|                               | SNP59 | Exon 6    | [A : C] | 0.0151   | Q > 0.10 | 3.0 |
|                               | SNP62 | Intron 6  | [T : G] | 0.0195   | Q > 0.10 | 2.0 |
|                               | SNP75 | Exon 10   | [T : C] | 3.15E-05 | 0.0035   | 3.2 |
|                               | SNP81 | Intron 10 | [T : C] | 0.0003   | 0.0195   | 2.0 |
| Tree height (H)               |       |           |         |          |          |     |
|                               | SNP44 | Intron1   | [G : T] | 0.0179   | Q > 0.10 | 1.2 |
|                               | SNP49 | Exon 3    | [A : T] | 0.0012   | 0.0551   | 4.3 |
|                               | SNP89 | 3'UTR     | [G : C] | 0.0351   | Q > 0.10 | 2.1 |
| Stem volume(V)                |       |           |         |          |          |     |
|                               | SNP75 | Exon 10   | [T : C] | 3.02E-05 | 0.0035   | 4.6 |
|                               | SNP81 | Intron 10 | [T : C] | 0.0143   | Q > 0.10 | 2.0 |

$R^2$  = percentage of the phenotypic variance explained.  $Q$ -value = correction for multiple testing [false discovery rate FDR ( $Q$ )  $\leq$  0.10]
