# Supplementary material for: Allelic Variation in a Cellulose Synthase Gene (PtoCesA4) Associated with Growth and Wood Properties in Populus tomentosa
Source: PubMed Central journal article supplement (PMC3815066; doi:10.1534/g3.113.007724), 2013-11-01
Supplement: supp_g3.113.007724_TableS3.pdf [file supp_g3.113.007724_TableS3.pdf]

**Table S3** A summary of genetic associations between SNPs and phenotypic traits detected in *Populus tomentosa* association population using a multilocus Bayesian model (BAMD)

| Trait                         | Number of SNPs | $R^2$ | Locus | Position  | Mutation              |
|-------------------------------|----------------|-------|-------|-----------|-----------------------|
| Lignin                        | 4              | 0.102 | SNP24 | Promoter  | [A : T] <sup>nc</sup> |
|                               |                |       | SNP44 | Intron1   | [G : T] <sup>nc</sup> |
|                               |                |       | SNP49 | Exon 3    | [C : A] <sup>ns</sup> |
|                               |                |       | SNP60 | Exon 6    | [G : C] <sup>s</sup>  |
| $\alpha$ -cellulose           | 7              | 0.124 | SNP3  | Promoter  | [A : G] <sup>nc</sup> |
|                               |                |       | SNP18 | Promoter  | [T : A] <sup>nc</sup> |
|                               |                |       | SNP36 | promoter  | [A : T] <sup>nc</sup> |
|                               |                |       | SNP41 | 5'UTR     | [T : C] <sup>nc</sup> |
|                               |                |       | SNP49 | Exon 3    | [C : A] <sup>ns</sup> |
|                               |                |       | SNP62 | Intron 6  | [T : G] <sup>nc</sup> |
|                               |                |       | SNP81 | Intron 10 | [T : C] <sup>nc</sup> |
| Holocellulose                 | 5              | 0.090 | SNP45 | Exon 2    | [A : C] <sup>s</sup>  |
|                               |                |       | SNP48 | Intron 2  | [A : T] <sup>nc</sup> |
|                               |                |       | SNP66 | Exon 7    | [A : G] <sup>s</sup>  |
|                               |                |       | SNP81 | Intron 10 | [T : C] <sup>nc</sup> |
|                               |                |       | SNP88 | Exon 12   | [G : A] <sup>ns</sup> |
| Fiber length                  | 3              | 0.066 | SNP44 | Intron1   | [G : T] <sup>nc</sup> |
|                               |                |       | SNP75 | Exon 10   | [T : C] <sup>s</sup>  |
|                               |                |       | SNP89 | 3'UTR     | [G : C] <sup>nc</sup> |
| Fiber width                   | 4              | 0.106 | SNP23 | promoter  | [T : C] <sup>nc</sup> |
|                               |                |       | SNP59 | Exon 6    | [A : C] <sup>ns</sup> |
|                               |                |       | SNP70 | Intron 9  | [A : T] <sup>nc</sup> |
|                               |                |       | SNP90 | 3'UTR     | [G : A] <sup>nc</sup> |
| Microfibril angle (MFA)       | 3              | 0.071 | SNP7  | promoter  | [C : G] <sup>nc</sup> |
|                               |                |       | SNP18 | Promoter  | [T : A] <sup>nc</sup> |
|                               |                |       | SNP48 | Intron 2  | [A : T] <sup>nc</sup> |
| Diameter at breast height (D) | 7              | 0.090 | SNP23 | promoter  | [T : C] <sup>nc</sup> |
|                               |                |       | SNP36 | promoter  | [A : T] <sup>nc</sup> |
|                               |                |       | SNP48 | Intron 2  | [A : T] <sup>nc</sup> |

|                 |   |       |       |           |                       |
|-----------------|---|-------|-------|-----------|-----------------------|
|                 |   |       | SNP62 | Intron 6  | [T : G] <sup>nc</sup> |
|                 |   |       | SNP75 | Exon 10   | [T : C] <sup>s</sup>  |
|                 |   |       | SNP80 | Intron 10 | [A : G] <sup>nc</sup> |
|                 |   |       | SNP81 | Intron 10 | [T : C] <sup>nc</sup> |
| Tree height (H) | 2 | 0.039 |       |           |                       |
|                 |   |       | SNP49 | Exon 3    | [A : T] <sup>ns</sup> |
|                 |   |       | SNP81 | Intron 10 | [T : C] <sup>nc</sup> |
| Stem volume(V)  | 3 | 0.067 |       |           |                       |
|                 |   |       | SNP36 | promoter  | [A : T] <sup>nc</sup> |
|                 |   |       | SNP75 | Exon 10   | [T : C] <sup>s</sup>  |
|                 |   |       | SNP80 | Intron 10 | [A : G] <sup>nc</sup> |

$R^2$  = percentage of the phenotypic variance explained; nonsynonymous polymorphism (ns); synonymous polymorphism (s); noncoding polymorphism (nc).
