# Supplementary material for: Allelic Variation in a Cellulose Synthase Gene (PtoCesA4) Associated with Growth and Wood Properties in Populus tomentosa
Source: PubMed Central journal article supplement (PMC3815066; doi:10.1534/g3.113.007724), 2013-11-01
Supplement: supp_g3.113.007724_TableS4.pdf [file supp_g3.113.007724_TableS4.pdf]

**Table S4 Summary of significant SNP marker-trait pairs identified in *PtoCesA4* at the threshold of  $P \leq 0.05$ , using the *Populus tomentosa* linkage population, “YX01” (*Populus. alba* × *P. glandulosa*) as the female and clone “LM 50” (*P. tomentosa*) as the male.**

| Trait                         | Locus | Position | Alleles of parents<br>(Female : Male) | Linkage population<br>( $N = 1200$ ) |          |                    |
|-------------------------------|-------|----------|---------------------------------------|--------------------------------------|----------|--------------------|
|                               |       |          |                                       | P-value                              | Q-value  | R <sup>2</sup> (%) |
| Lignin                        |       |          |                                       |                                      |          |                    |
|                               | SNP3  | Promoter | [AA : AG]                             | 0.0070                               | Q > 0.10 | 1.3                |
|                               | SNP49 | Exon 3   | [AC : AC]                             | 0.0105                               | Q > 0.10 | 2.0                |
| α-cellulose                   |       |          |                                       |                                      |          |                    |
|                               | SNP18 | Promoter | [TT : AT]                             | 0.0036                               | 0.0693   | 2.8                |
|                               | SNP49 | Exon 3   | [AC : AC]                             | 0.0015                               | 0.0490   | 3.6                |
|                               | SNP75 | Exon 10  | [CT : CT]                             | 0.0019                               | 0.0532   | 1.5                |
|                               | SNP91 | 3'UTR    | [AT : AA]                             | 0.0104                               | Q > 0.10 | 2.3                |
| Holocellulose                 |       |          |                                       |                                      |          |                    |
|                               | SNP18 | Promoter | [AT : AT]                             | 0.0281                               | Q > 0.10 | 3.0                |
|                               | SNP45 | Exon 2   | [AC : AA]                             | 0.0344                               | Q > 0.10 | 3.4                |
|                               | SNP88 | Exon 12  | [AG : AG]                             | 0.0034                               | 0.0693   | 1.9                |
| Fiber length                  |       |          |                                       |                                      |          |                    |
|                               | SNP59 | Exon 6   | [AA : AC]                             | 0.0423                               | Q > 0.10 | 2.7                |
|                               | SNP70 | Intron 9 | [AT : AT]                             | 0.0013                               | 0.0490   | 3.0                |
| Fiber width                   |       |          |                                       |                                      |          |                    |
|                               | SNP44 | Intron1  | [GT : GT]                             | 0.0082                               | Q > 0.10 | 1.9                |
|                               | SNP59 | Exon 6   | [AA : AC]                             | 0.0044                               | 0.0693   | 2.5                |
| Diameter at breast height (D) |       |          |                                       |                                      |          |                    |
|                               | SNP89 | 3'UTR    | [CG : CG]                             | 0.0100                               | Q > 0.10 | 4.0                |
| Tree height (H)               |       |          |                                       |                                      |          |                    |
|                               | SNP51 | Intron3  | [AC : AC]                             | 2.55E-05                             | 0.0050   | 3.0                |
|                               | SNP89 | 3'UTR    | [CG : CG]                             | 0.0351                               | Q > 0.10 | 2.1                |
| Stem volume(V)                |       |          |                                       |                                      |          |                    |

---

|       |          |           |        |          |     |
|-------|----------|-----------|--------|----------|-----|
| SNP18 | Promoter | [AT : AT] | 0.0093 | Q > 0.10 | 1.3 |
| SNP75 | Exon 10  | [CT : CT] | 0.0088 | Q > 0.10 | 5.4 |

---

$R^2$  = percentage of the phenotypic variance explained. Q-value = correction for multiple testing [false discovery rate FDR ( $Q \leq 0.10$ )]
